# Supplementary material for: Photochemically induced catalysis of iodide ion and iodine in the tetrathionate–periodate reaction
Source: Royal Society of Chemistry journal article supplement (doi:10.1039/b921858k), 2010-01-01
Supplement: b921858k.pdf [file b921858k.pdf]

# Supplementary Material for Photochemically Induced Dual Catalysis of Iodide Ion and Iodine in the Tetrathionate–Periodate Reaction

Ágnes Filáry<sup>†</sup>      Attila K. Horváth<sup>†\*</sup>

March 5, 2010

---

<sup>†</sup>Department of Inorganic Chemistry, University of Pécs, Ifjúság u. 6, Pécs, H-7624, Hungary

\*E-mail: horvatha@gamma.ttk.pte.hu

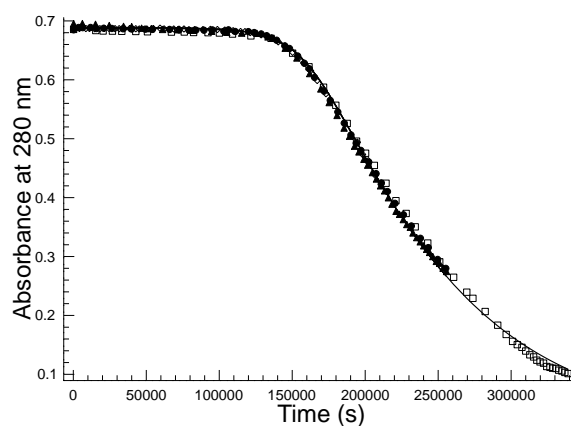

Figure S1: Measured (symbols) and calculated (solid lines) absorbance–time curves at different pHs in absence of initially added iodine and iodide ion.  $[S_4O_6^{2-}]_0=0.0003$  M,  $[IO_4^-]_0=0.0021$  M, pH=4.55 ( $\diamond$ ), 4.95 ( $\blacktriangle$ ), 5.25 ( $\square$ ), 5.55 ( $\bullet$ ).

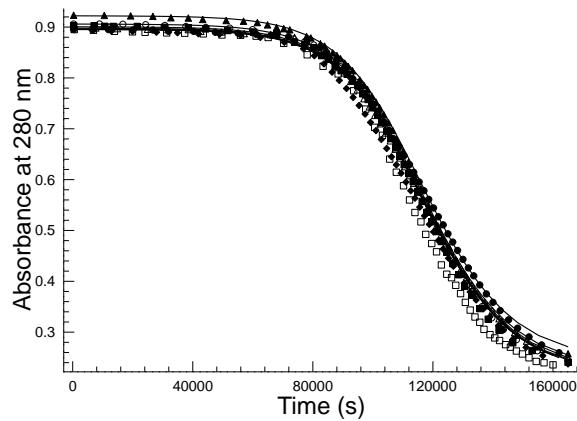

Figure S2: Measured (symbols) and calculated (solid lines) absorbance–time curves at different initial iodate concentrations in absence of initially added iodine and iodide ion.  $[S_4O_6^{2-}]_0=0.0016$  M,  $[IO_4^-]_0=0.0021$  M, pH=4.95,  $[ClO_3^-]_0/mM=0$  ( $\bullet$ ), 0.1 ( $\square$ ), 0.2 ( $\blacklozenge$ ), 0.5 ( $\triangle$ ), 1.0 ( $\blacksquare$ ), 2.0 ( $\circ$ ), 5.0 ( $\blacktriangle$ ).
